# Supplementary material for: Virulence Regulator EspR of Mycobacterium tuberculosis Is a Nucleoid-Associated Protein
Source: PubMed Central journal article supplement (PMC3315491; doi:10.1371/journal.ppat.1002621), 2012-03-29
Supplement: ppat.1002621.s003.pdf [file ppat.1002621.s003.pdf]

*ephA* (rv3617)

-1360 CATCGTCTCACCAAATCACACCGGGCACCGGCCTGAGAAGGGCTTGGGGAGCAGCCAGAGGGGATTGTGCGGGTGTCTGC  
-1360 GTA<sup>1</sup>GACGAGTGGTTTAGTGTGGCCCGTGGCCGGACTCTTCCCGAACCCCTCGTGGTCTCCGCTAACAGCGCCACGACG

-1280 CGCGCATCATTGATCGGCCGGCCGACCAGTGGGCCCTCCCTTGACGTCCGGATCGCACTTCTGTGCAGCTGGCATGGC  
-1280 GCGCGTAGTAACTAGCCGGCCGGCCTGGTCAGCCCGAGGGAAGTGCAGGCCTAGCGTGAAGGACACGTCGACCCGTACC

-1200 TACAGCTCACAGTGACTGCCCCACGATTCGCCGGCCAGGTCCAGTTCAAATTCGGGTGAATTCGCGGACAAAAGCAGCAGG  
-1200 ATGTCGAGTGTCACTGACGGGTGCTAACGGCCGGTCCAGGTCAAGTTAAGGCCACTTAAGCGCCTGTTTTCTGTCGTCC

-1120 TCAACCAA<sup>1</sup>CCGCAGTCACTCGAGGGTCCCAAACGTGAGCCAATCGGTGAAATGGCTTGTGTCAGTGACACCGGTTCACAGG  
-1120 AGTTGGTTGGCGTCAGTCAGCTCCAGGGTTTGCACCTCGGTTAGCCACTTTACCAGAACGACGTCACGTGGCCAGTGTCC

-1040 CTTAGCCGACAGCACCCGGAATAGTCTCAGGCGGGCTATAGAGTCTTATAGAAACATTTGCTGATAGAATTAACCGCTGTCT  
-1040 GAATCGGCTGTGTTGGCCTTATCGAGTCCGCCGATATCTCAGGATATCTTTGTAAACGACTATCTTAATTGGCGACAGA

-960 TGGCGTGATCTTGATACGGCTCGCCGTGCGACCGGTTGGCTCAGTAGCTGACCACATGTAACCCATCTTCGGCAGGTGT  
-960 ACCGCACTAGAATAATGCGGAGCGGCACGCTGGCCAACCGAGTCATCGACTGGTGGTACATTTGGGTAGGAGCCGTCCACA

-880 CTA<sup>1</sup>CTAAGCGAGACACCGCATTTGGTGGGGTGCATCGCAAATCGGTCCGAGCATGTAGCACTGCCGTTATCCCGGGATA  
-880 GATGATTCGCTCTGTGGCGTAAACACCCCGAGTAGCGTTTAGCCAGGCTCGTACATCGTGACGGCAATAGGGCCCTAT

-800 GCAAACCACCCGGAAC<sup>1</sup>CAGGGCTATCCAGTCGCTCTCCGACGGAGGCCGTTTCGCTTTCCGTTGCCCGATAACTCCCGA  
-800 CGTTTGGTGGCCCTTGGTCCGATAGGGTCAGCGAGAGGCTGCCTCCGGCAAAGCGAAAGCAACGGGCTATTGAGGGCT

-720 GTGGATATCGCGGTTATCAGATTCAGGCTTTTCTTCGCAAGGTACCGGTGTTTCGCTATATTCGGATATCTCGGACGGATA  
-720 CACCTATAGCCGCAATAGTCTAAGTCCGAAAAGAAGCGTTCCATGGCCACAAGCGATATAAGCCTATAGAGCCTGCCTAT

-640 ATTACTAAAAC<sup>1</sup>TTCAGTGGTTTAGATAAAGCCGCGCAATACTTCGCCGATCTTGCCGAGCGCAACGGATTTCCATCGTC  
-640 TAATGATTTTGAAGTCACCAAATCTATTCGGCGGCGTTATGAAGCGGCTAGAACGGCTCGCGTTGCCCTAAAGGTAGCAG

-560 GGTTTTCGTCGCTTATCAAACATGATCGGAGATAATGACAGATCGGCCTAGCTAGGTGTTTAGCGGACGCGATTTAGGA  
-560 CCAAAGCAGCGGAATAGTTTGTACTAGCCCTATTACTGTCTAGCCGGATCGATCCACAAATCGCCTGCGCTAAATCCT

-480 CAACCGAGATTTGCTTTGCCTCGCAACCATGAGAGCGCCCGCTTCGACGCCGAATCGGGTGAAGTATGGTGGGTTAGCA  
-480 GTTGGCTCTAAACGAAACGGAGCGTTGGTACTCTCGCGGGCGAAGCTGCGGCTTAGCCACTCACTACCACCCAATCGT

-400 CAGCCCTGATTGCGCCACCGCGAGGTGATTGTGCCCGCCACGAGGCCGCCCGGCTAGCCCATGAGCACACTATATA  
-400 GTCGGGACTAACCGGGTGGCCGCTCCACTAACACGGGCGGTGCTCCGGCGGCGCCGATCGGGGTACTCGTGTGATATAT

-320 GACTCTCTGCAACAGATCTCATAACGATCGAAGGCGAAGCGCAGGCATCGACGTCGGAGACACTGCCTTGGGATCGCGC  
-320 CTGAGAGGACGTTGTCTAGAGTATGGCTAGCTTCCGCTTCGCGTCCGTAGCTGCAGCCTCTGTGACGGAACCCTAGCGCG

-240 CGCCTACACGGCGGTTGGCGCATTTGTGCGAGCGCAGTTGCGAGAGGGCAAATGTGCGCAGACGATGTAGTCGACAACAAG  
-240 GCGGATGTGCCGCCAACCGCGTAAACAGCGTCGCGTCAACGTCTCCGTTTACACCGGCTGTGTACATCAGCTGTTGTTCT

-160 TGAACATGCCGCTTTCACGAACTCAAAC<sup>1</sup>TGACGATCTGCTTAGCATGAAAAAACTGTTGACATCGGCCAAGCATGACA  
-160 ACTTGTACGGCAGAAGTGTGTTGACTGTCTAGACGAATCGTACTTTTTTTGACAACTGTAGCCGGTTCGTACTGT

-80 GCCAGACTGTAGGCTTACGCGTGCAATGCGAACC<sup>1</sup>AAGGCTATGCATGGAATCGACGACCGGTTGAGATAGGCGGCAGGC  
-80 CGGTCTGACATCCGGGATGCGCACGTTACGTCTTGGTCCGATACGTACCTTAGCTGCTGGCAACTCTATCCGCCGTCCG

- 1 ATG
- 1 TAC

*espA* (rv3616c)
