# Supplementary material for: Virulence Regulator EspR of Mycobacterium tuberculosis Is a Nucleoid-Associated Protein
Source: PubMed Central journal article supplement (PMC3315491; doi:10.1371/journal.ppat.1002621), 2012-03-29
Supplement: ppat.1002621.s004.pdf [file ppat.1002621.s004.pdf]

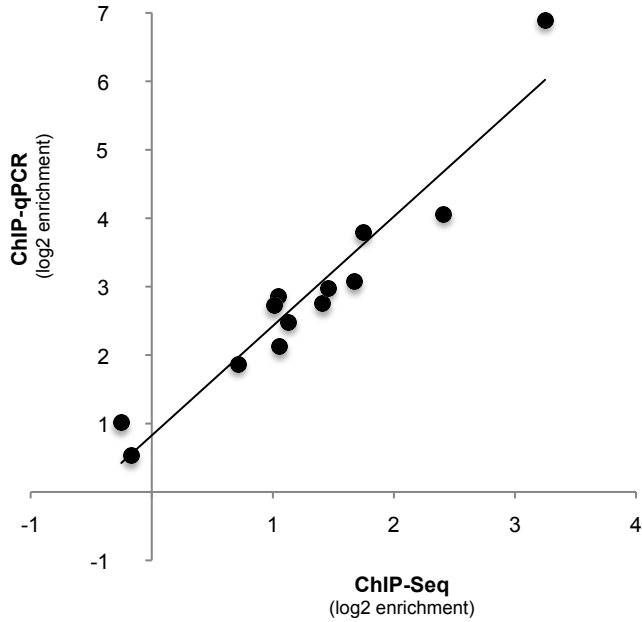

| Rv number | Gene name     | Peak number | Peak start | Peak end | Peak feature | ChIP-Seq Score | ChIP-Seq (log2 enrich.) | ChIP-qPCR (log2 enrich.) |
|-----------|---------------|-------------|------------|----------|--------------|----------------|-------------------------|--------------------------|
| Rv0888    | <i>rv0888</i> | NA          | NA         | NA       | NA           | NA             | -0.2                    | 0.5                      |
| Rv2703    | <i>sigA</i>   | NA          | NA         | NA       | NA           | NA             | -0.3                    | 1.0                      |
| Rv2930    | <i>fadD26</i> | 395         | 3243769    | 3243870  | inside       | 1,267,869      | 3.2                     | 6.9                      |
| Rv3616c   | <i>espA</i>   | 563         | 4056792    | 4056893  | upstream     | 302,625        | 1.7                     | 3.8                      |
| Rv2336    | <i>rv2336</i> | 340         | 2610813    | 2610914  | overlapStart | 301,250        | 1.7                     | 3.1                      |
| Rv0304c   | <i>ppe5</i>   | 61          | 372558     | 372659   | inside       | 244,486        | 2.4                     | 4.1                      |
| Rv3888c   | <i>3888c</i>  | 620         | 4372704    | 4372805  | overlapStart | 194,815        | 1.0                     | 2.9                      |
| Rv3343c   | <i>ppe54</i>  | 506         | 3734612    | 3734713  | inside       | 172,539        | 1.4                     | 2.7                      |
| Rv3875    | <i>esxA</i>   | 609         | 4352602    | 4352703  | overlapStart | 118,926        | 1.5                     | 3.0                      |
| Rv1795    | <i>eccD5</i>  | 294         | 2032054    | 2032155  | upstream     | 116,034        | 1.1                     | 2.5                      |
| Rv0507    | <i>mmpL2</i>  | 142         | 597756     | 597857   | inside       | 111,626        | 0.7                     | 1.9                      |
| Rv3849    | <i>espR</i>   | 604         | 4323381    | 4323482  | upstream     | 84,752         | 1.1                     | 2.1                      |
| Rv1075c   | <i>1075c</i>  | 197         | 1200461    | 1200562  | upstream     | 58,258         | 1.0                     | 2.7                      |
