# Supplementary material for: Virulence Regulator EspR of Mycobacterium tuberculosis Is a Nucleoid-Associated Protein
Source: PubMed Central journal article supplement (PMC3315491; doi:10.1371/journal.ppat.1002621), 2012-03-29

*fadD26*

*rv1490*

*rv2929*

*pe\_pgrs19*

EspR [ $\mu$ M] 0 0.6 1.2 1.8 2.4 0 0.6 1.2 1.8 2.4

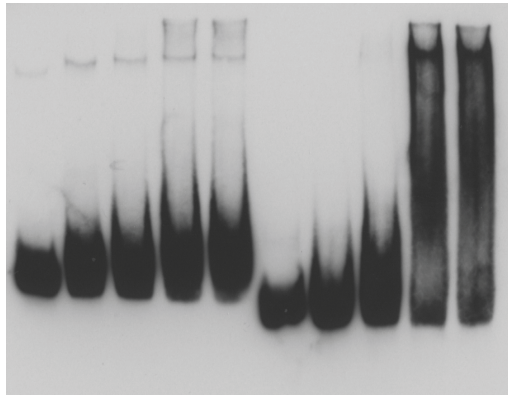

EspR [ $\mu$ M] 0 0.6 1.2 1.8 2.4 0 0.6 1.2 1.8 2.4

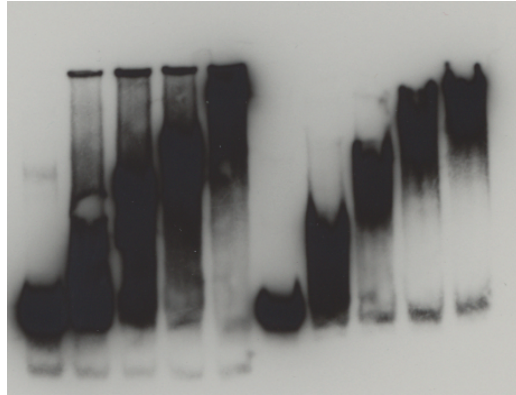

*espA*

*espA* ORF control

EspR [ $\mu$ M] 0 0.6 1.2 1.8 2.4 0 0.6 1.2 1.8 2.4

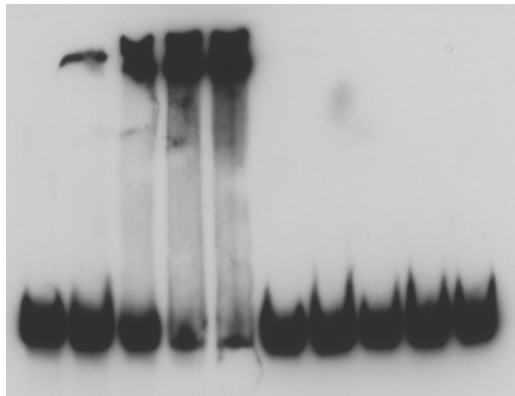

Supplement: ppat.1002621.s005.pdf [file ppat.1002621.s005.pdf]
