# Supplementary material for: Virulence Regulator EspR of Mycobacterium tuberculosis Is a Nucleoid-Associated Protein
Source: PubMed Central journal article supplement (PMC3315491; doi:10.1371/journal.ppat.1002621), 2012-03-29

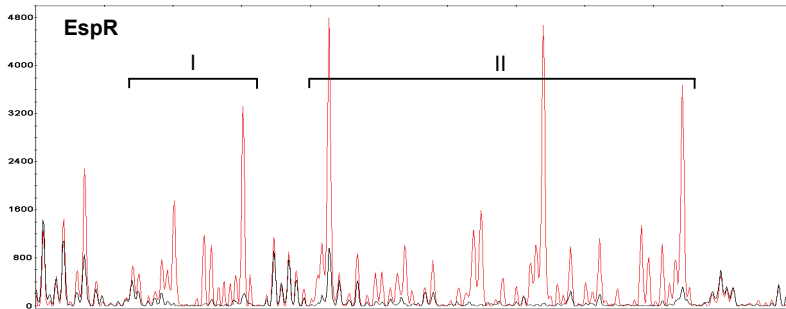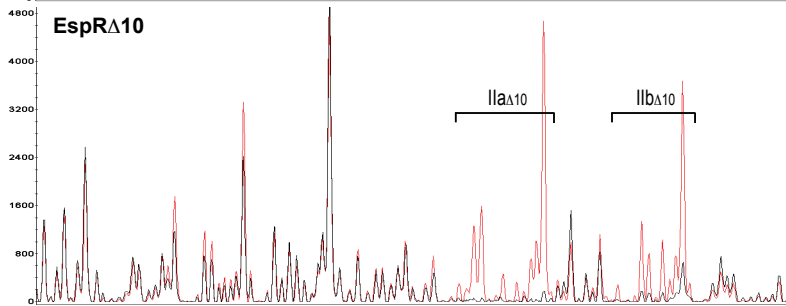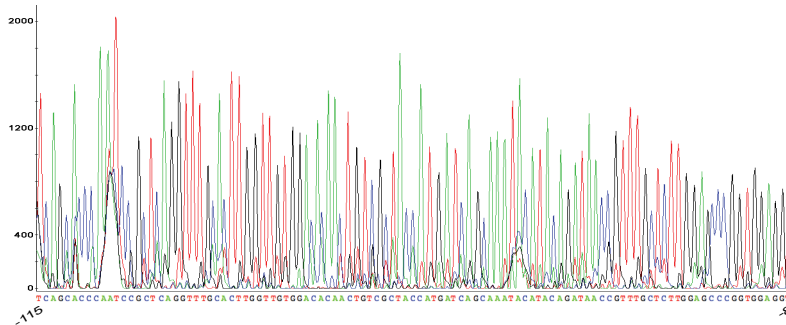

Supplement: ppat.1002621.s006.pdf [file ppat.1002621.s006.pdf]
