# Supplementary material for: Virulence Regulator EspR of Mycobacterium tuberculosis Is a Nucleoid-Associated Protein
Source: PLoS Pathog. 2012 Mar 29;8(3):e1002621. doi: 10.1371/journal.ppat.1002621 (PMC3315491; doi:10.1371/journal.ppat.1002621)
Supplement: Table S1 — List of primers used in this study. (PDF) [file ppat.1002621.s008.pdf]

**Table S1.** Primers used in this study

| Purpose                        | Name                                                                                                                                                                                                                                                                                                                                                                                                                              | Sequence (5'-3')                                                                                                                                                                                                                                                                                                                                                                                                                                                                                                                                                                                                                                                                                                                                                                                           |
|--------------------------------|-----------------------------------------------------------------------------------------------------------------------------------------------------------------------------------------------------------------------------------------------------------------------------------------------------------------------------------------------------------------------------------------------------------------------------------|------------------------------------------------------------------------------------------------------------------------------------------------------------------------------------------------------------------------------------------------------------------------------------------------------------------------------------------------------------------------------------------------------------------------------------------------------------------------------------------------------------------------------------------------------------------------------------------------------------------------------------------------------------------------------------------------------------------------------------------------------------------------------------------------------------|
| <b>ChIP-qPCR</b>               | 0888+3for<br>0888+269rev<br>CS-057-sigAF<br>CS-058-sigAR<br>fadD26+110for<br>fadD26+371rev<br>CS-159-espAF<br>CS-160-espAR<br>BB-174-2336F<br>BB-175-2336R<br>ppe5+4for<br>ppe5+275rev<br>BB-186-3888cF<br>BB-187-3888cR<br>BB-172-ppe54F<br>BB-173-ppe54R<br>BB-170-esxAF<br>BB-171-esxAR<br>BB-168-eccD5F<br>BB-169-eccD5R<br>BB-182-mmpL2F<br>BB-183-mmpL2R<br>espRpro196for<br>espRpro53rev<br>BB-178-1075cF<br>BB-179-1075cR | GGA TTA CGC CAA ACG CAT C<br>AAG TCG ATC AGG GCA TTG AG<br>AAA CAG ATC GGC AAG GTA GC<br>CTG GAT CAG GTC GAG AAA CG<br>TTG CTG ACA GCT TGA CTT GG<br>ACG GAC GAA GTC GTG AGA AT<br>GTT TAG CGG ACG CGA TTT AG<br>TGC TAA CCC ACC ATC ACT CA<br>GTC AAA TCC GTC ACG AAC CT<br>GGT TCC CAC ACC AGT TGT TT<br>AAC CTG GTC TCC ACA ACG TC<br>AAG TTA AAG CCG CCG AGA CT<br>GAC GTT ACC AGG TCC TCT CG<br>CGG CTC TTT GAG TGC ATT AG<br>ACT CAG TTG TCG GGG ATG TT<br>CGA ACC CAG TCA GAT TGT CC<br>CCA AGA AGC AGC CAA TAA GC<br>GAC GTG ACA TTT CCC TGG AT<br>AAG GCA AGG TCA ACC ACA AC<br>CAG CTA CTG CGG TCA TCG T<br>AGT ATC GCT AAG GTC ACC GC<br>ATG AGA ACG AGC AGG TTG GT<br>TGA AAT CCG TTC GTC GTG TG<br>TGA TCA TGG TAG CGA CAG TTG TG<br>TGA GCC GGA TAC CTT ACT GG<br>CGT GGA TAG CTG ACG AAC AA |
| <b>EMSA probes PCR</b>         | bio_espRpro106for<br>espRpro+6rev<br>bio_PespR-374for<br>PespR-264rev<br>BiofadD26+56for<br>fadD26+175rev<br>Bio2929-60for<br>2929+43rev<br>Bio1490-51for<br>1490+51rev<br>BioPepgrs19-73for<br>Pepgrs19+29rev<br>bio_PespA-1206for<br>PespA-1108rev<br>bio_espA+541for<br>espA+640rev                                                                                                                                            | biotin-AAT CCG CTC AGG TTT GCA CTT G<br>GCT CAT CGA TGT GAC CTC CAC<br>biotin-TCG CCT GAC GAG CGC TGT<br>TCA GGA TGA CCG TGT CGG GC<br>biotin-AGC CTG ACA GCA CTG CAT ATA C<br>ACT TGA GTT CTT CAG CAA TGA TGC<br>biotin-ACC TCA ACG ACA ATT TGC CAG<br>ATC TTC GGC CAG CTA CAT CC<br>biotin-TGC GTC GGT TAG TCT CTT TTT CG<br>AGT GTC GCT TGG TCG GCA<br>biotin-GAA AAC CGC CCC AGT TGC<br>TGC GAC GGA GAC ACC AAC<br>biotin-CAT GGC TAC AGC TCA CAG TGA CTG<br>TGC GGT TGG TTG ACC TGC TG<br>biotin-ATC ATT TCG GAT GTG GCG GAC<br>GCT TGT CCC AAA GCT CTT TCA GG                                                                                                                                                                                                                                        |
| <b>Footprinting probes PCR</b> | 6FAM_PespR-204for<br>espR+157rev                                                                                                                                                                                                                                                                                                                                                                                                  | 6FAM-GAT AAC CTG TGA AAT CCG TTC GTC G<br>GGT TTC CTG AGC GTA GCT GTG                                                                                                                                                                                                                                                                                                                                                                                                                                                                                                                                                                                                                                                                                                                                      |
| <b>5' RACE</b>                 | CS-132-espAR2<br>CS-133-espAR3<br>CS-135-espRR2<br>CS-136-espRR3                                                                                                                                                                                                                                                                                                                                                                  | GAA GTA CTC TAG TGA GGA GTA AAG GAT ACC<br>CCG AAC CTA ACC AGC CAT CAC C<br>CCT GAG CGT AGC TGT GAT AGG TAG G<br>GCG GAA GAA GTT GGC CAG G                                                                                                                                                                                                                                                                                                                                                                                                                                                                                                                                                                                                                                                                 |
| <b>pMYespR vector cloning</b>  | espR_Pptr_rev1<br>Pptr-H1<br>espR_Pptr_for2<br>espR_Pptr_H2_rev2                                                                                                                                                                                                                                                                                                                                                                  | GGC AGC GAA CGT CGT GCT CAT TCA GGC TCC TTG TAC GGT<br>ATG TTT AAG CTT CCA TCC TGA CGG ATG GCC TTA CGA GTT C<br>ACC GTA CAA GGA GCC TGA ATG AGC ACG ACG TTC GCT GCC<br>TTT TAA GCT TCT AAG CGT CGA TCC CTT CGG CA                                                                                                                                                                                                                                                                                                                                                                                                                                                                                                                                                                                          |

**qRT-PCR for gene expression**

|                  |                                |
|------------------|--------------------------------|
| espR+32for       | GCC TGT TCG ACA CGG TTT AT     |
| espR+261rev      | TTC CTT GTC GAG CTT TTC GT     |
| Pptr_espR-31for  | TAT CTT CCC GTA CAC CGT ACA AG |
| espR+155rev      | TTT CCT GAG CGT AGC TGT GA     |
| PespR-136for     | CTT CGT TGA CCC CTC ACA AC     |
| PespR-19rev      | GCT CCA AGA GCA AAC GGT TA     |
| espA+2for        | TGA GCA GAG CGT TCA TCA TC     |
| espA+257rev      | CTG ATG AGC TGA CGA TCG AG     |
| ephA+216for      | GAT CGA GGC CTA CGA CAT TC     |
| ephA+449rev      | AAG TTC TCC CCA AAC CTG CT     |
| 2929+84for       | CAT TCG CTG GAC ATT TGC T      |
| 2929+306rev      | AAG AAC CGA GGT CAG AGT GC     |
| fadD26+110for    | TTG CTG ACA GCT TGA CTT GG     |
| fadD26+371rev    | ACG GAC GAA GTC GTG AGA AT     |
| 1490+169for      | GAA GCT GTC TTT CCG AAT GC     |
| 1490+368rev      | AGG ATA AGC CAC ACC ACG AC     |
| pe_pgrs19+59for  | GTA TCG GTT CGG CAA TCA GC     |
| pe_pgrs19+312rev | GTT GAT CAA ACC CAG CAC CT     |
| pe_pgrs20+66for  | ATC GTC GAT CAA TGC CTC A      |
| pe_pgrs20+313rev | CGT TGA TCAAAC CCA GCA C       |
| ppe24+20for      | CGC CGG AGA TCA ATT CAG        |
| ppe24+306rev     | CGT CTT GAC CGC TTC AAA CT     |
| 0986+36for       | GAG CTG GAC ATT CCG AGA AG     |
| 0986+242rev      | TCT CGC TCG GTT TTC TGA GT     |
| 3488+31for       | CTG CAC ATC CTG CAC CAC        |
| 3488+254rev      | CGA TCC TCG GTC AGT GCT        |
| lipF+150for      | CGA CTA TCG GCT GAT CCC TA     |
| lipF+353rev      | GGA GAG ATG GCC ACT ATT GC     |
| fadB2+228for     | CAC CGA CCT CAA CGA CCT AT     |
| fadB2+443rev     | ACC GGA TTG AAG AAA TGC AG     |
| umaA+77for       | TAG ACC CCA CGA TGG CTT AC     |
| umaA+292rev      | GAT TGC GAC TGA GCG TGA TA     |
| CS-057-sigAF     | AAA CAG ATC GGC AAG GTA GC     |
| CS-058-sigAR     | CTG GAT CAG GTC GAG AAA CG     |
